# Supplementary material for: DNAzyme walker-driven, electrode-surface label/wash-free ultrasensitive ECL miRNA detection via ssDNA-enhanced peroxidase activity of g-C 3 N 4 nanosheets
Source: Royal Society of Chemistry journal article supplement (doi:10.1039/d5an01164g), 2025-12-03
Supplement: d5an01164g1.pdf [file d5an01164g1.pdf]

Supporting Information for

2

3 **DNAzyme Walker-Driven, Electrode-Surface Label/Wash-Free Ultrasensitive**  
4 **ECL miRNA Detection via ssDNA-Enhanced Peroxidase Activity of g-C<sub>3</sub>N<sub>4</sub>**  
5 **Nanosheets**

6 Jingwen Wu<sup>a, 1</sup>, Changgang Pan<sup>b, 1</sup>, Li Wang<sup>a</sup>, Yuefeng Li<sup>c, d, \*</sup>, Guoxi Liang<sup>b, \*</sup>

7 <sup>1</sup> These authors contributed equally to the study.

8 <sup>a</sup> School of Pharmacy, Jiangsu University, Zhenjiang 212013, P.R. China

9 <sup>b</sup> School of the Environment and Safety Engineering, Jiangsu University, Zhenjiang  
10 212013, P. R. China

11 <sup>c</sup> Department of Radiology, Affiliated People's Hospital of Jiangsu University,  
12 Zhenjiang 212002, PR China.

13 <sup>d</sup> College of Medicine, Jiangsu University, Zhenjiang 212013, PR China,

14 <sup>\*</sup> Corresponding authors. Email addresses: jiangdalyf@163.com (Y. Li),

15 gxliang@ujs.edu.cn (G. Liang)

16

17 **Table S1.** Oligonucleotide sequences used throughout the experiment.

| Oligo Name    | Sequence (from 5' to 3')                                  |
|---------------|-----------------------------------------------------------|
| Substrate DNA | HS-(T) <sub>14</sub> CACTATrAGGAAGAGATTATATATACC          |
|               | HS-                                                       |
| DNAzyme DNA   | (T) <sub>42</sub> AATCGTGATAGGGGTTCTCTTCTCCGAGCCGGTCGAAAT |
|               | AGT                                                       |
| Locking DNA   | AAGAGAACCCCTATCACGATTAGCATTA                              |
| MiRNA-155     | UUA AUGCUAAUCGUGAUAGGGGU                                  |
| MiRNA-21      | UAGCUUAUCAGACUGAUGUUGA                                    |
| MiRNA-144     | UACAGUAUAGAUGAUGUACU                                      |
| let-7a        | UGAGGUAGUAGGUUGUAUAGUU                                    |
| DNA b         | TTTGCAACACTC                                              |
| DNA c         | GGAAGAGATTATATATACC                                       |
| DNA d         | GCAGCCCCTAACCCTAACCCTAAAATCCGTCGAGCAGAGTT                 |
| DNA e         | AAGAGAACCCCTATCACGATTAGCATTA                              |
| DNA f         | CAGTCGCAACACTCAAGGCACGACTGTTTTTT                          |
| DNA g         | CGTGCCTTGAGTGTTGCTGAGGAGGCACG                             |
| DNA h         | GTTAGGGGCTGCGTCACACTCAA                                   |

18

19

20 **Table S2.** Standard addition recovery experiments of miRNA-155.

| Number | Detected(fM) | spiked (fM) | Detected (fM) | Recovery (%) | RSD (%) |
|--------|--------------|-------------|---------------|--------------|---------|
| 1      | Not detected |             | 5.09          | 101.80       |         |
| 2      | Not detected | 5           | 5.22          | 104.41       | 1.67    |
| 3      | Not detected |             | 5.24          | 104.89       |         |
| 4      | Not detected |             | 52.00         | 104.01       |         |
| 5      | Not detected | 50          | 47.97         | 95.94        | 4.77    |
| 6      | Not detected |             | 47.78         | 95.57        |         |
| 7      | Not detected |             | 516.44        | 103.29       |         |
| 8      | Not detected | 500         | 482.82        | 96.56        | 3.63    |
| 9      | Not detected |             | 487.86        | 97.57        |         |

21

## 22 **Optimization of Experimental Conditions**

23 Fig. S1A shows the ECL intensity generated in the presence of different  
 24 concentrations of luminol (fixed concentrations of  $\text{H}_2\text{O}_2$  with  $2 \times 10^{-3}$  M, and ssDNA/g-  
 25  $\text{C}_3\text{N}_4$  NS with  $100 \mu\text{g} \cdot \text{mL}^{-1}$ ), and Fig. S1B depicts the ECL intensity in the presence of  
 26 different concentrations of  $\text{H}_2\text{O}_2$  (fixed concentrations of luminol with  $10^{-10}$  M, and  
 27 ssDNA/g- $\text{C}_3\text{N}_4$  NS with  $100 \mu\text{g} \cdot \text{mL}^{-1}$ ). As the concentration of luminol or  $\text{H}_2\text{O}_2$   
 28 increases, the ECL signal is intensified, and the ssDNA/g- $\text{C}_3\text{N}_4$  NS can be used as a  
 29 catalytic label for the detection of  $\text{H}_2\text{O}_2$ .

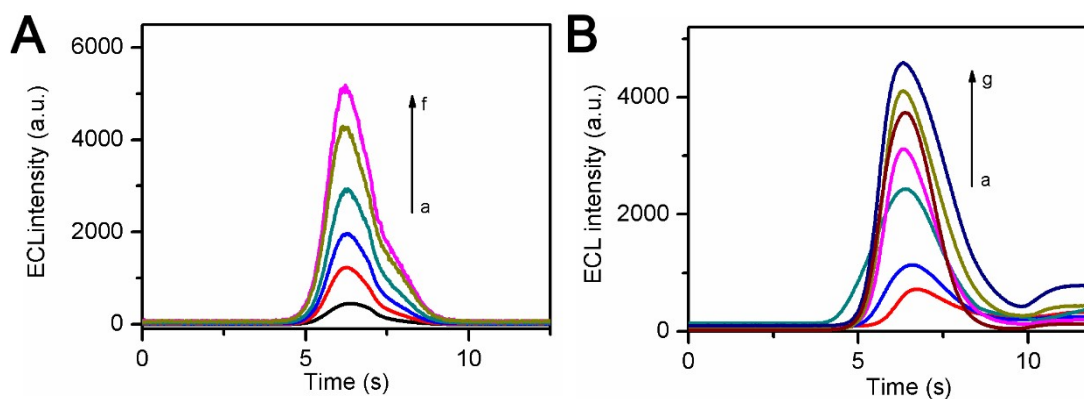

**Fig. S1.** (A) ECL spectra generated upon the oxidation of variable concentrations of luminol in the presence of  $2 \times 10^{-3}$  M  $\text{H}_2\text{O}_2$  and  $100 \mu\text{g} \cdot \text{mL}^{-1}$  ssDNA/g- $\text{C}_3\text{N}_4$  NS (a to f:  $10^{-12}$  to  $10^{-7}$  M). (B) ECL spectra generated upon the oxidation of luminol by variable concentrations of  $\text{H}_2\text{O}_2$  in the presence of  $10^{-10}$  M luminol and  $100 \mu\text{g} \cdot \text{mL}^{-1}$  ssDNA/g- $\text{C}_3\text{N}_4$  NS (a to g:  $2 \times 10^{-7}$ ,  $2 \times 10^{-6}$ ,  $2 \times 10^{-5}$ ,  $2 \times 10^{-4}$ ,  $2 \times 10^{-3}$ ,  $2 \times 10^{-2}$ ,  $2 \times 10^{-1}$  M).

To determine the conditions for optimal assay performance, the optimization conditions should be studied systematically for the following relevant variables: (1) concentration of  $\text{Mn}^{2+}$ ; (2) cleavage time.

Further effort is required to understand and better control the concentration of  $\text{Mn}^{2+}$  to dominate the DNAzyme walker. Fig. S2 shows the effect of the concentration of  $\text{Mn}^{2+}$  on the ECL intensity. The ECL signal reached a plateau when the concentration of  $\text{Mn}^{2+}$  was beyond  $8 \mu\text{M}$ .

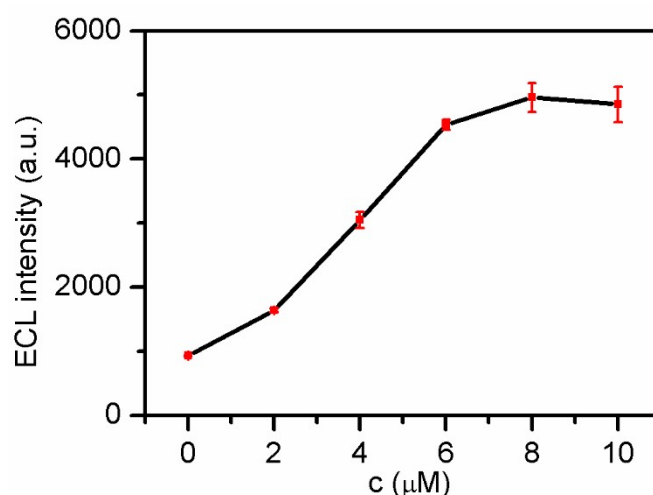

44

45 **Fig. S2.** The optimization of  $Mn^{2+}$  concentrations on the ECL intensity by catalytic  
 46 oxidation of luminol in the presence of  $H_2O_2$  and g- $C_3N_4$  NS.

47 The target-triggered recycling amplification releases ssDNA by switching the  
 48 DNAzyme walker from a locked (inactive) state to an unlocked (active) state via  $Mn^{2+}$ -  
 49 dependent cleavage. So  $Mn^{2+}$ -dependent DNAzyme cleavage time had a great effect on  
 50 the efficiency of enzyme cascade amplification, and the optimum cleavage time of  
 51  $Mn^{2+}$ -dependent DNAzyme was investigated. The results show, the ECL increased and  
 52 then remained stable, almost constant after 2 h, until the time exceeded 3 h, as seen in  
 53 Fig. S3. Therefore, the cleavage time was fixed at 2 h for further exploration.

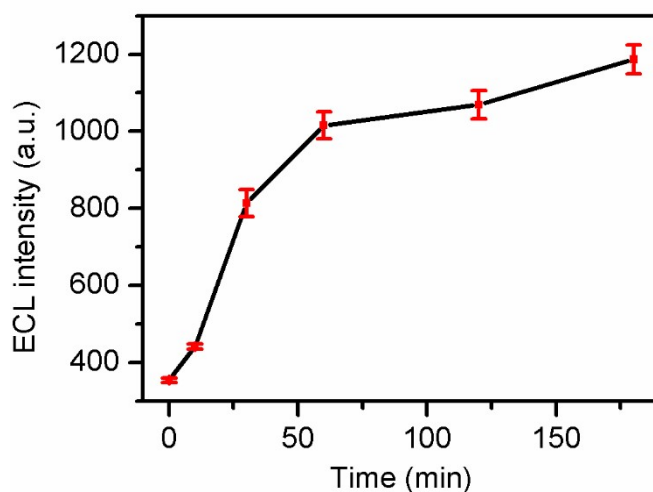

54

55 **Fig. S3.** The study of the effect of DNAzyme cleavage time on the ECL intensity by  
56 catalytic oxidation of luminol in the presence of  $\text{H}_2\text{O}_2$  and  $\text{g-C}_3\text{N}_4$  NS.

57 The ECL behaviors of various lengths of the ssDNA and hairpin DNA were  
58 exploited while keeping the total concentration of nucleosides constant. In detail, the  
59 number of bases of DNA was as follows (a: none; b:12; c:19; d:41; e:29; f:32; g: hairpin  
60 29; h: hairpin 23), and the results were exhibited in Fig. S4. For ssDNA-modified  $\text{g-C}_3\text{N}_4$  NS, the catalytic activity increased with the length of the ssDNA, indicating that  
61 the enhancement originates from the surface-bound DNA. The activity was enhanced  
62 significantly when the number of bases reached 19, while the enhancement of the  
63 significantly when the number of bases reached 19, while the enhancement of the  
64 hairpin DNA was weaker, due to the  $\text{g-C}_3\text{N}_4$  NS's stronger affinity to ssDNA than  
65 dsDNA.

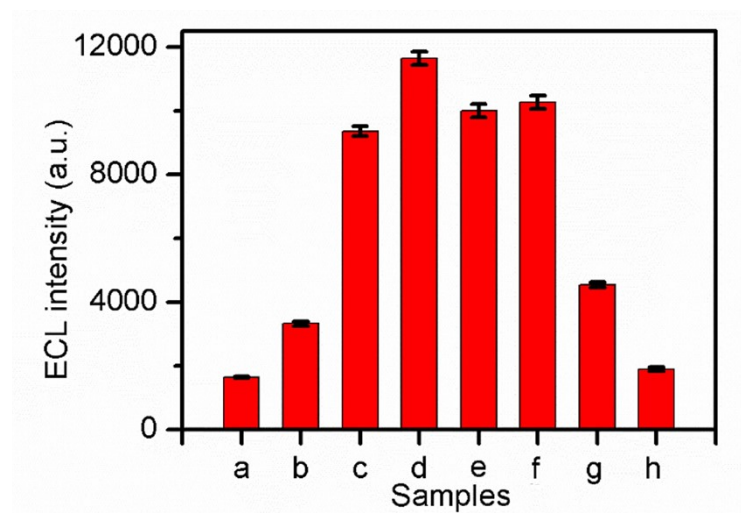

66  
67 **Fig. S4.** The study of the effect of DNA length on the ECL intensity by catalytic  
68 oxidation of luminol in the presence of  $\text{H}_2\text{O}_2$  and  $\text{g-C}_3\text{N}_4$  NS.

69
